# Recapitulating Human Ovarian Aging Using Random Walks

Joshua Johnson, Ph.D.<sup>1\*</sup>, John W. Emerson, Ph.D.<sup>2</sup>, and Sean D. Lawley, Ph.D.<sup>3</sup>

<sup>1</sup>University of Colorado School of Medicine-AMC, Department of Obstetrics and Gynecology, Division of Reproductive Endocrinology and Infertility, Division of Reproductive Sciences, Building RC2, Room P15 3103, Mail Stop 8613, Aurora, Colorado 80045, USA

<sup>2</sup>Yale University, Department of Statistics and Data Science, 24 Hillhouse Avenue, Room B06, New Haven, CT, 06520, USA

<sup>3</sup>University of Utah, Department of Mathematics, 155 South 1400 East, JWB 233, Salt Lake City, UT, 84112, US

**Mechanism(s) that control whether individual human primordial ovarian follicles (PFs) remain dormant, or begin to grow, are all but unknown. One of our groups has recently shown that activation of the Integrated Stress Response (ISR) pathway can slow follicular granulosa cell proliferation by activating cell cycle checkpoints. Those data suggest that the ISR is active and fluctuates according to local conditions in dormant PFs. Because cell cycle entry of (pre)granulosa cells is required for PF growth activation (PFGA), we propose that rare ISR checkpoint resolution allows individual PFs to begin to grow. Fluctuating ISR activity within individual PFs can be described by a random process. In this paper, we model ISR activity of individual PFs by one-dimensional random walks (RWs) and monitor the rate at which simulated checkpoint resolution and thus PFGA threshold crossing occurs. We show that that the simultaneous recapitulation of i) the loss of PFs over time within simulated subjects, and ii) the timing of PF depletion in populations of simulated subjects equivalent to the distribution of the human age of natural menopause can be produced using this approach. In the RW model, the probability that individual PFs grow is influenced by regionally fluctuating conditions, that over time manifests in the known pattern of PFGA. Considered at the level of the ovary, randomness appears to be a key, purposeful feature of human ovarian aging.**

Aging | ANM | DNA damage | EIF2 $\alpha$ /EIF2S1 | follicle | fertility | oocyte | ovary | mathematical modeling | MATLAB | menopause | primordial follicle | R language | simulation | translational control

Correspondence: [joshua.2.johnson@cuanschutz.edu](mailto:joshua.2.johnson@cuanschutz.edu)

## Author Contributions

J.J., S.D.L., and J.W.E. designed simulations; S.D.L. performed and documented mathematical analyses, J.W.E. wrote discrete step simulation R code and documentation, J.J. drafted and completed the manuscript.

## Introduction

Human ovarian aging depends upon the rate of loss of a dormant reserve of primordial follicles (PFs) to a growth phase (1–3). Individual PFs consist of a single immature egg cell (oocyte) surrounded by a layer of non-proliferative somatic pregranulosa cells. PF growth activation (PFGA) consists of pregranulosa cells entering into a slow but active cell cycle, and they are now termed granulosa cells (4). PF commitment to growth and therefore loss from the reserve (also referred to as “decay”) is thought to be irreversible.

Follicle numbers across the lifespan from the time of their development during fetal life (5, 6) through postmenopausal

life have been assessed directly in histological preparations (3; validated by 7, 8). Of the hundreds of thousands of PFs in the human PF reserve, most are destined to die some time after PFGA in a process termed atresia, and only a very small fraction survives to ovulate a mature egg once per menstrual cycle. Human menopause occurs when the number of arrested PFs drops below a threshold of hundreds to perhaps a thousand (1, 9–12). At this time, the supply of growing follicles essentially ceases, leading to the loss of menstrual cyclicity. The age at natural menopause (ANM) is such that approximately 1 in 250 women reach it at or before age 35, and 1 in 100 at or before age 40. The median ANM is 51, and very few women reach menopause after age 62 (13). A central goal in reproductive biology and medicine is the determination of mechanisms that dictate the decision of individual PFs to undergo PFGA, and how this results in the patterns of decline seen in individual women (e.g., “subjects”) in order to give rise to the known ANM distribution.

Cellular stress and particularly oxidative damage have long been associated with ovarian aging (14–17), and one of our groups is probing how endogenous physiological stress and damage impact PFs directly. Using a combination of wet laboratory and bioinformatics approaches, we have recently identified the stress-and-damage-regulated Integrated Stress Response (ISR) pathway (18, 19) as a new potential key regulator of ovarian aging throughout the ovary and at the level of individual PFs (20). In that work we showed that the PFGA stimulator Tnf $\alpha$  leads to a rapid ISR response, including the upregulation of the translation of proteins involved in cellular repair. As its name suggests, the ISR coordinates responses to a variety of cellular insults, integrating them so that conserved cellular machinery can respond to and repair induced damage. Successful cellular repair can result in ISR checkpoint resolution and a return to the active cell cycle. Based upon this, we have developed a model (summarized in the Graphical Abstract, Figure i) based upon physiological regional fluctuations (Fig. ia) of ISR activity that occur in granulosa cells during normal ovarian function (20). We hypothesize that it is *checkpoint resolution* of physiological stress and DNA damage that allows a switch to an active cell cycle and PFGA (21–25).

Quantitative descriptions of the pattern of loss of PFs from the ovarian reserve have a long history (9, 26–30). Histological specimen-derived numbers of PFs across the lifespan were fit using a variety of types of equations (i.e., power, dif-

ferential equation, biphasic, etc.). In one report, the accuracy of fit of different equations was evaluated, and a differential equation model was found to generate a curve that best matched human PF decay (30). In a separate simulation-based approach, we evaluated probabilities of PFGA over time that can result in PF reserve loss that can match patterns seen in nature (bioRxiv preprint, 31). While these approaches described follicle loss quite accurately, and can be interpreted *post hoc* in terms of how known regulators of PFGA are likely to function, none of them can be considered a mechanistic "forward" derivation of patterns of follicle loss.

We reasoned that if the biological mechanisms at work in individual PFs that dictate the probabilities of arrest or growth over time can be clarified, we might be able to predict and simulate PFGA over time in a way that recapitulates the natural pattern. Our ISR data and proposed model (20) suggested that individual PFs experiencing regionally fluctuating stress and damage (and thus ISR activity) over time might reflect a situation analogous to a random walk (RW; 32, 33) relative to a threshold of growth activation (Fig. ib). In this case, threshold crossing would occur randomly for individual PFs over (simulated) time. RW models consist of simulated conditions that exhibit change over time such that a positional value of  $X$  varies by "walking," taking steps of size  $\Delta x$ , and the direction of each step is random (33). In continuous RWs, the size of stochastic fluctuations is referred to as "Diffusivity" (variable  $D$ ), and deterministic (i.e., a degree of nonrandom) motion is referred to as "Drift" ( $V$ ). When Drift is present in a one-dimensional RW with two possible directions of movement, the probability of movement in either direction is not equal. We hypothesized that when all PFs within the ovary are considered in terms of the local signals they receive, the resulting pattern of PFGA over time will reflect the output of a one-dimensional RW that includes a growth threshold. To our knowledge, that ovarian aging might involve RW behavior has not been previously considered, and modeling along these lines has not been previously reported.

In this study, we used RWs (34) to model the behavior of the PF reserve and monitored how random movement of simulated PFs relative to a PFGA threshold might relate to patterns of ovarian aging in subjects and in populations of simulated women. Formal mathematical analysis produces continuous RWs as seen when determined by Brownian motion/diffusion (35). A corresponding discrete step (e.g., non-continuous) RW model was developed using the R statistical programming language R (36), and conditions were established where PFs executed RW steps representing fluctuating ISR activity over a time course of the discrete simulated months of the human postnatal lifespan.

Different approaches were used to model plausible variation between subjects, and to evaluate the impact on simulated ovarian aging and the population ANM. These included i. the impact of the known distribution of initial PF number (a subject's "Starting Supply" (37)), ii. homogenous vs. heterogeneous ISR action (modeled as "Drift"  $V$  within the RW, graphical abstract, double-headed arrow) in simulated subjects within populations and iii. time-invariant vs. time-

variant Drift in simulated subjects within populations. In all cases, model output was compared to a benchmark dataset of actual PF numbers reflective of decay over time (3) and the known distribution of the human ANM. Annotated code for re-analysis and reproduction of output is provided. When ISR activity within PFs is simulated using RWs that occur relative to a threshold, output can be seen to closely match natural patterns of ovarian aging in subjects and in population(s) of women.

## Results

Our identification of the ISR as a potential regulatory mechanism rests upon the concept that ISR activity fluctuates over time within PFs due to physiological processes that fluctuate over time regionally within the ovary (Fig. i, data evaluating mouse PFs in 20). We hypothesized that modeling ISR activity as a one-dimensional RW would generate patterns of follicle growth activation (and thus loss from the ovarian reserve) if that RW included a threshold for the state change between dormancy and growth.

**Mathematical model of fluctuating ISR activity and PFGA.** For a single PF in a given woman, we model fluctuating ISR activity by a RW. PFGA occurs when the ISR activity of this PF crosses a threshold. Crossing that threshold results in a PF's subtraction from the ovarian reserve.

To describe our mathematical model precisely, let  $X(t)$  denote the ISR activity of a single PF at time  $t \geq 0$ . Here, time  $t$  is the age of the woman so that time  $t = 0$  corresponds to her birth. To model ISR fluctuations as in 20 (see also Figure i), suppose that the ISR activity in this PF either increases or decreases by an amount  $\Delta x > 0$  over a time step  $\Delta t > 0$ . Mathematically, this is expressed as

$$X((n+1)\Delta t) = \begin{cases} X(n\Delta t) + \Delta x & \text{with probability } p, \\ X(n\Delta t) - \Delta x & \text{with probability } 1-p, \end{cases} \quad (1)$$

where  $p$  is the probability that ISR activity increases. The lefthand side of Eq. (1) is the ISR activity after  $n+1$  time steps, which is given by the ISR activity after  $n$  time steps (i.e.  $X(n\Delta t)$ ) plus or minus the amount  $\Delta x$ . This type of model is called a random walk because the value of  $X$  "walks" by taking steps of size  $\Delta x$ , and the direction of each step (either up or down) is random (32).

If the steps  $\Delta t$  and  $\Delta x$  are small, then the discrete random walk in Eq. (1) is equivalent to the continuous random walk whose dynamics are described by the stochastic differential equation (35),

$$dX = -V dt + \sqrt{2D} dW, \quad (2)$$

where  $W(t)$  is a standard Brownian motion and

$$D = \frac{(\Delta x)^2}{2\Delta t}, \quad V = \frac{2\Delta x}{\Delta t} \left( \frac{1}{2} - p \right). \quad (3)$$

The equivalence of the discrete model Eq. (1) and the continuous model Eq. (2) for small steps  $\Delta t$  and  $\Delta x$  is shown in the Appendix.

In words, Eq. (2) means that over an infinitesimal time  $dt$ , the ISR activity  $X$  changes by an amount  $dX$  equal to a deterministic amount  $-V dt$  plus a stochastic fluctuation  $\sqrt{2D}dW$ , where  $dW$  is normally distributed with mean zero and variance  $dt$ . The parameter  $D$  is called the "Diffusivity" as it describes the size of the stochastic fluctuations, and  $V$  is called the "Drift" as it describes the deterministic (i.e. nonrandom) motion. Biologically, the Drift  $V$  represents the efficiency of cellular repair in our model. Notice that  $V > 0$  if  $p < 1/2$ , which means that  $X$  tends to decrease.

We suppose that a PF begins to grow when its ISR activity drops below some "growth" threshold. We also suppose that a PF dies before it begins to grow if its ISR activity rises above some "death" threshold. Without loss of generality, we take the growth threshold to be at  $X = 0$  and the death threshold at  $X = L > 0$ . Hence, a PF leaves the reserve at the first time  $\tau$  such that  $X(\tau) \notin (0, L)$ . Since paths of  $X$  are random, this reserve exit time  $\tau$  is random.

Let  $N$  be the number of PFs in a given woman's reserve at birth, which we refer to as her Starting Supply. Let  $F(t)$  denotes the number of PFs in a given woman's reserve at time  $t$  (and thus  $F(0) = N$ ). We assume that the reserve exit times for each of the  $N$  PFs are independent and identically distributed, and thus the expected number of PFs in the reserve at time  $t$  is

$$\mathbb{E}[F(t)] = N\mathbb{P}(\tau > t), \quad (4)$$

where  $\mathbb{E}$  denotes averaging over the reserve exit times.

**Random walk model recapitulates PF decay.** PF Data from -0.25 years to 0.1 years in Wallace and Kelsey (3) were selected in order to establish the Starting Supply distribution (Supplemental Figure S1). The median Starting Supply was found to be

$$N = 3.23 \times 10^5. \quad (5)$$

For this median Starting Supply value Eq. (5), we sought parameter values for the random walk model to make the expected PF decay curve in Eq. (4) fit the PF counts reported by Wallace and Kelsey (3). Since we can always rescale the ISR activity, without loss of generality we set the initial ISR activity to unity,  $X(0) = 1$ . This parameter search then yielded the following values for the Diffusivity and Drift,

$$D = 0.004 \text{ year}^{-1}, \quad V = 0.051 \text{ year}^{-1}, \quad (6)$$

and any value of the death threshold  $L \geq 2$ . By taking the limit of a large death threshold (i.e.  $L \rightarrow \infty$ ), we obtain the following formula for the expected follicle decay curve,

$$\mathbb{E}[F(t)] = \frac{N}{2} \left[ 1 + \operatorname{erf}\left(\frac{1-Vt}{\sqrt{4Dt}}\right) - e^{V/D} \left( 1 - \operatorname{erf}\left(\frac{1+Vt}{\sqrt{4Dt}}\right) \right) \right], \quad (7)$$

where  $\operatorname{erf}(z) := \frac{2}{\sqrt{\pi}} \int_0^z e^{-y^2} dy$  is the Gauss error function. In the Appendix, we derive Eq. (7) and show that the difference between Eq. (7) and the expected follicle decay curve for any  $L \geq 2$  is negligible for  $D$  and  $V$  in Eq. (6).

The formula Eq. (7) with the median Starting Supply value  $N$  in Eq. (5) and  $D$  and  $V$  in Eq. (6) yields the solid blue curve in Figure 1a. In particular, by tuning only two parameters ( $D$  and  $V$  in Eq. (6)), this mathematical model yields a follicle decay curve in Eq. (7) that closely fits the human follicle decay data reported by Wallace and Kelsey (3).

In fact, the model curve in Eq. (7) fits the PF data nearly as well as the non-mechanistic curve used in Wallace and Kelsey (3). More precisely, Wallace and Kelsey (3) posited a flexible functional form (the so-called asymmetric double-Gaussian cumulative (ADC) curve), and then chose 5 free parameters in this phenomenological function so that the resulting curve fit this same PF count data, plus some prenatal PF counts. Here, "fit" is defined in terms of the sum of squared errors between the curve and the logarithm of the PF counts. By this measure of fit, our model curve in Eq. (7) is only 3% worse than this prior curve.

**Random walk model recapitulates human ANM distribution.** Human menopause occurs when the number of PFs in the ovarian reserve drops below a threshold of approximately 1000 (38). Hence, we can use our mathematical model of PF decay to study menopause timing.

The solid blue PF decay curve in Figure 1a crosses the 1000 PF threshold (horizontal black line) at age 51 years. Hence, this curve corresponds to an ANM equal to 51 years. However, there is considerable population variability in the Starting Supply  $N$  of PFs at birth. All else being equal, women with starting supplies higher (respectively, lower) than the median Starting Supply will tend to reach menopause later (respectively, earlier) than age 51.

To understand how Starting Supply population variability translates into ANM population variability, we first characterize the Starting Supply population distribution. As our Starting Supply data, we use the 30 PF counts in (3) taken from women within a few months of birth. We show in the Appendix that these data are well-described by a log-normal distribution with parameters

$$\mu = 12.686, \quad \sigma = 0.497. \quad (8)$$

That is, we model the distribution of the Starting Supply as

$$N = \exp(\mu + \sigma Z), \quad (9)$$

where  $Z$  is a standard normal random variable and  $\mu$  and  $\sigma$  are in Eq. (8). The median of this Starting Supply distribution in Eq. (9) is  $\exp(\mu) = 3.23 \times 10^5$  given in Eq. (5). As pointed out above, the solid blue PF decay curve in Figure 1a that starts from this median Starting Supply yields an ANM equal to 51 years. Interestingly, the median ANM across a population is also approximately 51 years (39–41). Hence, this solid blue curve in Figure 1a can be understood as describing the "median woman." The dashed blue curves in Figure 1a show the PF decay curves for different quantiles of the Starting Supply distribution in Eq. (9) (namely, the 1, 5, 25, 75, 95, 99% quantiles).

Model ANM output is compared with available information about the human ANM distribution as follows. First, the ANM distribution across a population of women who only vary in their Starting Supply  $N$  (as in 1a) is considered. In particular, the blue dashed curve in Figure 1c was generated by simulating the PF decay dynamics of  $10^4$  women, where each woman begins with a Starting Supply  $N$  sampled independently from the log-normal distribution in Eq. (9), and the ANM for each of the  $10^4$  simulated women is the time when their PF reserve drops below 1000. The PF decay dynamics for each woman follow the RW model described above, with Diffusivity  $D$  and Drift  $V$  in Eq. (6). The blue diamonds in Figure 1c is the ANM distribution reported by Weinstein et al. (39). When only variable Starting Supply was present in the RW model and Drift was fixed, model output (blue dashed line) and the empirical Weinstein et al. ANM distribution (blue diamonds) were in close agreement. We emphasize that this agreement follows merely from combining the empirical Starting Supply distribution in Eq. (9) with our RW model, where the two free parameters in the RW model ( $D$  and  $V$  in Eq. (6)) were chosen to fit PF decay data.

The agreement between the model and the ANM data Weinstein et al. (39) in Figure 1c is compelling, but there are some caveats. First, the ANM data from McKinlay et al. (41) in Figure 1c (black squares) is evidently more variable than the ANM data from Weinstein et al. (39) (blue diamonds). Second, the only source of population variability in the model for the blue curve in Figure 1c is in Starting Supply. That is, each of the  $10^4$  simulated women has identical Diffusivity and Drift parameters  $D$  and  $V$  in Eq. (6). However, it is not plausible that all intrinsic (e.g., genetic, epigenetic) and extrinsic (environmental) conditions that determine PFGA timing are entirely identical between women.

To address these two issues, we introduce an additional source of population heterogeneity into our model by allowing the Drift parameter  $V$  to vary between simulated women in addition to the Starting Supply  $N$ . There are many possible choices that we could make for the population distribution of  $V$ , but for concreteness and we allow  $V$  to vary between women according to

$$V = \bar{V}(1 + cY), \quad (10)$$

where  $\bar{V} = 0.051 \text{ year}^{-1}$  as in Eq. (6),  $c = 0.03$ , and  $Y$  is a standard normal random variable independent of  $N$  in Eq. (9). In words, Eq. (10) simply means that the Drift parameter  $V$  for each woman is normally distributed with mean (and median)  $\bar{V}$  and 3% coefficient of variation.

The solid blue PF decay curve in Figure 1b is identical to the “median woman” solid blue curve in Figure 1a, since it is for the median Starting Supply in Eq. (5) and the median of the Drift distribution in Eq. (10). The dashed blue curves in Figure 1b are for the same quantiles of the Starting Supply distribution as in Figure 1a, but the Drift parameters for each of these 6 curves are sampled from the distribution in Eq. (10). Notice that these dashed curves sometimes cross, which means that a woman with a large Starting Supply may at some point have less PFs in her reserve than a woman with

a smaller Starting Supply, due to differences in their Drift parameters. Biologically, this represents individual differences in the rate of follicle loss over time as might be influenced by genetics or environmental exposures.

The black dotted curve in Figure 1c shows the ANM distribution resulting from a variable Starting Supply and a variable Drift. This ANM distribution was generated from the model analogous to the blue curve in Figure 1c, except the Drift parameter for each simulated woman varied according to Eq. (10). This plot shows that by introducing population heterogeneity into the Drift parameter, the model yields an ANM distribution in line with the McKinlay et al. (41) data. Histograms depicting the ANM distributions produced by each of the RW conditions are shown in Supplemental Figure S2.

**RW model flexibility.** The analysis above shows that a simple RW model can recapitulate some prominent features of ovarian aging seen in nature. However, ovarian aging is a complex, multi-faceted process involving a variety of dynamic components. The purpose of this section is to show how our RW framework can be adapted to model different aspects of ovarian biology.

For example, the RW modeling framework can be used to investigate the effects of an acute drop in PF number. Such acute drops are common effects of certain cancer treatments (42–45). In Figure 2a, RW traces for 50 simulated subjects are shown when Subject-Variable Drift (identical to that shown in Figure 1b) is applied, but PF Starting Supply is fixed at the reported median. The impact of an acute drop in PF number at approximately simulated age 12 is shown (asterisk, after 10). After PF number is adjusted in this way, RW traces are again shown for 50 simulated subjects, and an acceleration in the times that the ANM threshold is crossed is apparent when compared to uninterrupted decay.

The RW modeling framework can also be used to investigate the purported acceleration of PF loss during human ovarian aging (46) thought to arise due to declining levels of Antimüllerian hormone (AMH) late in the third decade. While definitive experimental evidence that AMH slows PFGA and ovarian aging in other mammals is available (47, 48), it is less clear that AMH has this same role during ovarian aging in women *in vivo* (49).

Acceleration in PF loss as might be seen in response to declining AMH levels can be incorporated into the model by allowing the Drift parameter to increase over time. To illustrate, we let the mean Drift parameter in Eq. (10) change at age 38 according to

$$\bar{V} = \begin{cases} 0.024 \text{ year}^{-1} & \text{before age 38,} \\ 0.033 \text{ year}^{-1} & \text{after age 38.} \end{cases} \quad (11)$$

Given that the acceleration in PF loss around this time is more likely to be continuous, as the decline in AMH levels can be seen to be continuous in this window of time (50), we also tested more continuous Drift modifications, but the difference between those and the simple stepwise Drift modification was negligible (not shown). Figure 2b shows example PF decay

trajectories for women with different starting supplies (equal to the quantiles in Figure 1a) and whose Drift parameters varied in time according to Eq. (11) and varied between women according to Eq. (10).

When Subject-Variable Drift was applied and stepwise acceleration occurred (Fig. 2b), an ANM distribution was produced that again greatly resembles the actual ANM distribution (Supplemental Fig. S2). In addition to a direct visualization of the impact of accelerating Drift as might be expected due to declining AMH levels as women approach their forties, this approach demonstrates the flexibility of the RW model as it can be modified in order to begin to address these questions.

**Software for further investigation.** As illustrated above, a variety of biological factors can be investigated using the RW modeling framework. We therefore developed user-friendly R code for RW simulations with detailed documentation so that we ourselves and other interested parties can modify conditions, and, can add additional conditions that might influence PF loss (code available in a public repository, see Methods section). This code allows one to alter a variety of conditions along possible degrees of freedom (e.g., variables like Starting Supply, acute follicle loss as shown in Figure 2a, Drift acceleration as in 2b, etc.) to investigate how such variables impact ovarian aging. Users can modify these conditions and add additional variables, perhaps as informed by their own experimental results.

## Discussion

The ISR pathway responds to cellular damage and stress by upregulating the translation of factors that can repair damage, possibly allowing checkpoint resolution and the resumption of growth. Our prior work demonstrates that widespread and constitutive activation of the ISR in ovarian follicles contributes to blocked or very slow growth due to checkpoint activation. In the case of PFs, only those whose pregranulosa cells are able to achieve ISR checkpoint resolution begin to grow, and this would be favored within permissive regional "microenvironments" in the ovary. We describe this model of PFGA and subsequent patterns of follicle development and death as reminiscent of a 'gauntlet,' because follicles must overcome continuously changing regional stressors, and repair incurred damage in order to grow and survive. Consideration of how patterns of checkpoint resolution might be established given dynamic, regional changes in the ovary over time, and the stochastic nature of the ISR led us to consider whether ovarian aging could be described mathematically by a random process. Following through with this logic, RW modeling of PF behavior (similar to Diffusion Decision Modeling as described by 51, 52) recapitulated ovarian aging at the level of simulated subjects and across populations in terms of the ANM. This mechanistic RW determination of primordial follicle decay and ANM distribution is distinct from non-mechanistic approaches where a curve is constructed mathematically in order to fit a series of data points. Unlike curve fitting approaches (as assessed in 30), the simu-

lation approach used in this study generates synthetic data *de novo* which can be seen to recapitulate actual ovarian aging data. We next consider advantages and limitations of our use of RWs to model ovarian aging.

**Advantages.** The RW approach is quite simple. Our model in its simplest form was able to fit both cross-sectional follicle decay data and an ANM distribution by choosing only two free parameters. The pattern of PFGA can be considered a by-product consequence of physiologically fluctuating ISR activity relative to a growth threshold, without the need for complex signaling or sensing that dictates whether an individual PF begins to grow or stays dormant. It may be that a more complex mechanism(s) ultimately dictates this decision, but the RW process appears capable of giving rise to the natural pattern of follicle loss.

Importantly, this interpretation in no way contradicts existing data on genetic and environmental factors that influence the overall rate of PFGA. For example, genetic model systems and large scale Genome Wide Association Studies (GWAS) have revealed genes and pathways that influence the rate of ovarian aging and the ANM (53, 54). For example, Antimüllerian hormone (AMH) negatively regulates the PFGA rate (47, 48), and Phosphatase and tensin homolog deleted on chromosome ten (PTEN; 55–57) also negatively regulates PFGA as seen in accelerated loss of the PF reserve in mouse knockouts. Loss of *Tumor necrosis factor alpha* (*Tnf $\alpha$* , 58), or, *Tumor necrosis factor receptor 2* (*Tnfr2*, 59) has the opposite effect, where PFGA is significantly slowed and the duration of ovarian function is extended. Downstream NF $\kappa$ B signaling also has been implicated in ovarian aging (53), and disruption of NF $\kappa$ B inhibitory proteins I $\kappa$ B $\alpha$  and I $\kappa$ B $\beta$  also significantly slows the rate of PFGA (60). In addition to key protein signals, micro RNAs (miRNAs) and longer noncoding RNA species (ncRNAs) have been shown to regulate PFGA (61–65). In the case of ncRNAs let-7/H19, this occurs due to their regulation of AMH levels (66). It has not been clear, however, how these and other signaling pathways combine in their action in order to determine known patterns of PF loss (2, 4, 67–69). We now hypothesize that it is the combined action of all such identified factors that ultimately influence ISR activity, and that this integration of stress, damage, and signaling events gives rise to patterns of ovarian aging.

The recapitulation of ovarian aging patterns by RWs also illuminates several features that are fascinating but have been difficult to explain. First, it is well-known that growing (pre-antral) follicles are present during prepubertal life in the human ovary, but insight as to what controls their numbers has been lacking. The RW approach provides a reasonable explanation for the onset and continuation of PFGA prior to puberty, and also the characteristic "plateau" in PF numbers during this time. This is because, if the RW process begins around the time of birth, there is a delay before the first follicles can engage in RWs for enough time such that they can cross the PFGA threshold in appreciable numbers. As presented here, appreciable numbers of PFs begin to be available in the window of time corresponding to menarche on-

set. Next, the supply of growing follicles between puberty and late in the third decade of life is consistent. The RW model gives rise to this stable supply of PFs in this window of (simulated) time, given the application of Drift. It is also well-known that PFs and occasionally, growing follicles are present in the postmenopausal ovary. The RW model favors the continued presence and decay of PFs after menopause, and given a reasonably stable rate of PFGA, the rare commitment to growth would still occur in these later years. Mechanisms that control the maximum ANM can also be considered in new ways. Because some simulated subjects have nearly an order of magnitude greater Starting Supply of PFs, one or more mechanism must be in place that limits the ANM at approximately 62 years. Following along the results presented here, either a high PF Starting Supply must correspond to accelerated follicle loss compared to lower PF starting supplies, or the loss of the PFGA-slowing action of factors like AMH leads to acceleration in PFGA such that women almost never have more than 1000 PFs remaining by age 62. These possibilities can be modeled as alterations in Drift.

Our provision of the formal mathematical treatment of continuous and discrete-step models, and also user-modifiable code for discrete-step modeling makes it possible for interested parties to both reproduce our results, and also to test the effects of modifying the models upon patterns of PFGA and ovarian aging. Users can "tune" their modeling conditions as we did in cases of Starting Supply, Drift, and Diffusivity, with additional conditions that may better reflect actual signaling within the ovary, including mechanisms that have yet to be identified. Especially in the case of the discrete step RW R code, tuning can be performed by non-mathematics professionals. A final advantage of such tuning is evident in the way that inter-subject variability relates to patterns of ovarian aging and population-level ANM. While our results support Starting Supply as a plausible central factor in determining how the ANM differs between women (consistent with 37), modeling output is improved when both Starting Supply and Subject-Variable Drift are applied. The RW approach can be refined (and compared to alternative approaches) as biological mechanisms are revealed and higher quality female reproductive aging datasets become available.

**Limitations.** Despite what we consider compelling advantages, our approach has several limitations. First, we must acknowledge that the decades-long time scale of the process makes the normal behavior of individual PFs very difficult to track for direct follicle-by-follicle comparison to modeling results. In terms of the RW approach, while it is true that we only needed two free parameters to fit available follicle decay data and the known human ANM distribution, we acknowledge that there are many possible parameters (e.g, degrees of freedom) that could be tuned in order to produce RWs that faithfully reproduce these natural patterns. The tuning that we performed was justifiable in terms of known biological measurements (Starting Supply) and the action of biological signaling factors (as in the modeling of accelerating PFGA due to declining AMH as the stepwise alteration of RW Drift). However, the mathematical treatment of those

biological features was done with the defined goal in mind of matching patterns of ovarian aging. Even so, it is satisfying that the action of a RW can so closely match PF loss and the ANM distribution when constructed in a logical fashion and subject to so few model variables.

We also acknowledge limitations with the best-available datasets used for RW modeling. As the authors that compiled the dataset(s) of histological PF numbers over time noted, how ovarian specimens were procured may influence the evaluated pattern of PF decline (3). It is reasonable to expect that ovaries collected during autopsy are mostly representative of a random sampling from the general population. However, especially at later ages, ovary removal during elective surgery is less likely to be representative of the general population. Until non-invasive and accurate methods of PF number estimation become available, we and others will remain limited to cross-sectional data of PF numbers such as these. There are also caveats related to available datasets for the human ANM distribution. These are related to imprecision due to patient self-reporting their timing of menopause (defined as a year without menses; 39–41), and also to the fixed, artificial threshold of 1000 PFs (38) used to define menopause onset in simulated women.

Next, despite expression of core ISR machinery in pregranulosa and granulosa cells, we have limited direct experimental evidence that ISR activity varies relative to a threshold in the pregranulosa cells of human PFs *in vivo*. We have generated immunofluorescence data that shows variable levels of the core ISR regulatory factor P-eIF2 $\alpha$  in mouse PF pregranulosa cells and oocytes (Hagen-Lillevik, submitted, preprint available at <https://www.researchsquare.com/article/rs-1682172/v1>). However, despite our prior detection of P-eIF2 $\alpha$  in human nongrowing follicles (20), a study comparing P-eIF2 $\alpha$  levels in nongrowing follicles in multiple replicate human ovary specimens has not yet been performed. While it is highly likely that regional differences in stress and damage occur similarly between the mouse and human ovary, it may be that mechanisms that respond to these dynamic local conditions differ between the species. As mentioned, stochastic ISR checkpoint resolution is our favored model of the switch that activates PFGA, but the proposed RW could be greatly influenced by signals that function separately, or parallel, to the ISR.

**Final considerations.** RWs appear to provide a useful framework for the modeling of human ovarian aging. We consider the following final points the major implications of this model. First and foremost, the recapitulation of ovarian aging by RWs suggests that random action may be an evolutionary strategy used to ensure that a *minimum* duration of ovarian function occurs in almost all women. It may be that more strict PFGA control mechanisms would be more susceptible to dysregulation, and that randomness is protective against catastrophic PF loss. Next, our main model variables, PF Starting Supply and RW Drift, are likely to be determined both by genetic/inherited factors in individuals and by environmental exposures. Genes identified in loss-of-function experimental studies and GWAS approaches may influence

Starting Supply and/or Drift. In the case of Drift, these would likely be genes involved in the resolution of stress and cellular damage as at least in our model, these would modulate the probability of checkpoint resolution and cell cycle entry. Similarly, exposure to factors like chemotherapeutic agents could be acting at the level of Drift, as the acute cellular response to damage would be upregulation of repair factors that again should impact the probability of checkpoint resolution, cell cycle entry, or death. Future experiments may be able to address these questions directly.

In the current model we treat the decision to undergo PFGA as if a single unit enters the cell cycle. As more information becomes available, we can more precisely model the multiple pregranulosa cells in human PFs, and how interactions between pregranulosa cells and with the oocyte influence RW behavior. We do not suggest that individual PFs behave in unpredictable ways. Instead, PFs likely respond to their local conditions in regulated, nonrandom ways, as dictated by known signaling pathways. However, PFs are exposed to conditions that change over time within the ovary, and simple, random processes are shown here to closely recapitulate the pattern of PFGA over time. We can therefore consider the mammalian ovary as a non-trivial, emergent, self-organizing system, with limited adaptive capacity. The ovary's critical functions as the transmitting organ of the female germline as well as its support of female health and well-being prior to menopause are clearly non-trivial. That the simple system can deliver a consistent supply of maturing follicles that meets reproductive and endocrinological needs for decades is suggestive of emergent self-organization. Last, the ovary's adaptive capacity is limited by the requirement that eggs produced can support reproduction by that subject. Adaptation can thus occur that alters ovarian function, but not in a way that compromises reproductive potential. Diverse future approaches including direct experimentation and further model refinement can be used to investigate how the pattern of ovarian aging in individual subjects and across populations of mammals, including women, is influenced by random behavior of ovarian follicles.

## Materials and Methods

**Data sourcing and definitions.** We performed a literature review of reports of numbers of primordial/nongrowing follicles, and established parameters for our modeling approach based upon i) the distribution(s) of measured numbers of PFs present in the human ovary over time (3) and ii) the degree of variability between women in terms of their cessation of ovarian function (39–41, 70–72). Follicle number data used in this study were generated from published plots (40, 41) using the data extraction tool WebPlotDigitizer (73). Although loss of ovarian function prior to the age of 40 is defined clinically as reflective of a pathological state, termed primary ovarian insufficiency (POI; 70), we included the possibility that random action could result in measurable numbers of women that exhaust their PF reserve by that time.

**Matlab and R code.** Data were downloaded from their respective sources and analyzed using Matlab or R (36) as indicated in order to interrogate RW modeling of datasets. Matlab (<https://doi.org/10.6084/m9.figshare.19834774.v1>) and R (<https://doi.org/10.6084/m9.figshare.19858987.v1>) code used in the manuscript are available in a public repository for download and use.

## ACKNOWLEDGEMENTS

Nanette Santoro, M.D., Amanda Kallen, M.D., Aaron Clauset, Ph.D., and Kelle Moley, M.D. are gratefully acknowledged for key suggestions provided during the development of the manuscript. The graphical abstract was produced by Kimen Design4Research.

## Conflict of interest statement

The authors have declared no competing interest.

## Funding

J.J. support by CU-Anschutz Department of Obstetrics and Gynecology Research Funds and McPherson Family Funds. S.D.L. is supported by NSF CAREER DMS-1944574 and NSF DMS-1814832.

## Bibliography

1. S. J. Richardson, V. Senikas, and J. F. Nelson. Follicular depletion during the menopausal transition: evidence for accelerated loss and ultimate exhaustion. *J Clin Endocrinol Metab*, 65(6):1231–1237, Dec 1987.
2. G. F. Erickson. Follicle growth and development. *Glob Libr Women's Med*, 2008. doi: 10.3843/GLOWM.10289.
3. W. H. Wallace and T. W. Kelsey. Human ovarian reserve from conception to the menopause. *PLoS One*, 5(1):e8772, Jan 2010.
4. A. Kallen, A. J. Polotsky, and J. Johnson. Untapped Reserves: Controlling Primordial Follicle Growth Activation. *Trends Mol Med*, 24(3):319–331, 03 2018.
5. M. E. Pepling and A. C. Spradling. Female mouse germ cells form synchronously dividing cysts. *Development*, 125(17):3323–3328, Sep 1998.
6. M. E. Pepling and A. C. Spradling. Mouse ovarian germ cell cysts undergo programmed breakdown to form primordial follicles. *Dev Biol*, 234(2):339–351, Jun 2001.
7. M. McLaughlin, T. W. Kelsey, W. H. Wallace, R. A. Anderson, and E. E. Telfer. An externally validated age-related model of mean follicle density in the cortex of the human ovary. *J. Assist. Reprod. Genet.*, 32(7):1089–1095, Jul 2015.
8. M. McLaughlin, T. W. Kelsey, W. H. Wallace, R. A. Anderson, and E. E. Telfer. Non-growing follicle density is increased following adriamycin, bleomycin, vinblastine and dacarbazine (ABVD) chemotherapy in the adult human ovary. *Hum Reprod*, 32(1):165–174, 01 2017.
9. M. J. Faddy and R. G. Gosden. A model conforming the decline in follicle numbers to the age of menopause in women. *Hum Reprod*, 11(7):1484–1486, Jul 1996.
10. M. De Vos, P. Devroey, and B. C. Fauser. Primary ovarian insufficiency. *Lancet*, 376(9744): 911–921, Sep 2010.
11. N. Santoro and J. Johnson. Diagnosing the Onset of Menopause. *JAMA*, Jul 2019.
12. E. A. Ford, E. L. Beckett, S. D. Roman, E. A. McLaughlin, and J. M. Sutherland. Advances in human primordial follicle activation and premature ovarian insufficiency. *Reproduction*, 159(1):R15–R29, 01 2020.
13. E. B. Gold. The timing of the age at which natural menopause occurs. *Obstet Gynecol Clin North Am*, 38(3):425–440, Sep 2011.
14. A. Agarwal, S. Gupta, and R. K. Sharma. Role of oxidative stress in female reproduction. *Reprod Biol Endocrinol*, 3:28, Jul 2005.
15. C. Tatone, M. C. Carbone, S. Falone, P. Aimola, A. Giardinelli, D. Caserta, R. Marci, A. Pandolfi, A. M. Ragnelli, and F. Amicarelli. Age-dependent changes in the expression of superoxide dismutases and catalase are associated with ultrastructural modifications in human granulosa cells. *Mol Hum Reprod*, 12(11):655–660, Nov 2006.
16. C. Tatone, F. Amicarelli, M. C. Carbone, P. Monteleone, D. Caserta, R. Marci, P. G. Artini, P. Piomboni, and R. Focarelli. Cellular and molecular aspects of ovarian follicle ageing. *Hum Reprod Update*, 14(2):131–142, 2008.
17. K. H. Oktay, G. Bedoschi, S. B. Goldfarb, E. Taylan, S. Titus, G. E. Palomaki, T. Cigler, M. Robson, and M. N. Dickler. Increased chemotherapy-induced ovarian reserve loss in women with germline BRCA mutations due to oocyte deoxyribonucleic acid double strand break repair deficiency. *Fertil Steril*, 113(6):1251–1260, Jun 2020.
18. K. Pakos-Zebrucka, I. Koryga, K. Mnich, M. Lujic, A. Samali, and A. M. Gorman. The integrated stress response. *EMBO Rep*, 17(10):1374–1395, 10 2016.
19. M. Costa-Mattoli and P. Walter. The integrated stress response: From mechanism to disease. *Science*, 368(6489), 04 2020.

20. E. Llerena Cari, S. Hagen-Lillevik, A. Giornazi, M. Post, L. Appiah, B. Bitler, A.J. Polotsky, N. Santoro, J. Kieft, K. Lai, and J. Johnson. Integrated stress response control of granulosa cell translation and proliferation during normal ovarian follicle development. *Molecular Human Reproduction*, 27(8), 2021. doi: 10.1093/molehr/gaab050.
21. W. K. Kaufmann and R. S. Paules. DNA damage and cell cycle checkpoints. *FASEB J*, 10(2):238–247, Feb 1996.
22. I. A. Shaltiel, L. Krenning, W. Bruinsma, and R. H. Medema. The same, only different - DNA damage checkpoints and their reversal throughout the cell cycle. *J. Cell. Sci.*, 128(4): 607–620, Feb 2015.
23. J. Bartek and J. Lukas. DNA damage checkpoints: from initiation to recovery or adaptation. *Curr. Opin. Cell Biol.*, 19(2):238–245, Apr 2007.
24. F. Marini, T. Nardo, M. Giannattasio, M. Minuzzo, M. Stefanini, P. Plevani, and M. Muzi Falconi. DNA nucleotide excision repair-dependent signaling to checkpoint activation. *Proc. Natl. Acad. Sci. U.S.A.*, 103(46):17325–17330, Nov 2006.
25. V. A. Smits and D. A. Gillespie. DNA damage control: regulation and functions of checkpoint kinase 1. *FEBS J*, 282(19):3681–3692, Oct 2015.
26. M. J. Faddy, E. C. Jones, and R. G. Edwards. An analytical model for ovarian follicle dynamics. *J Exp Zool*, 197(2):173–185, Aug 1976.
27. A. Gougeon, R. Ecochard, and J. C. Thalabard. Age-related changes of the population of human ovarian follicles: increase in the disappearance rate of non-growing and early-growing follicles in aging women. *Biol Reprod*, 50(3):653–663, Mar 1994.
28. K. R. Hansen, N. S. Knowlton, A. C. Thyer, J. S. Charleston, M. R. Soules, and N. A. Klein. A new model of reproductive aging: the decline in ovarian non-growing follicle number from birth to menopause. *Hum Reprod*, 23(3):699–708, Mar 2008.
29. M. J. Faddy. Follicle dynamics during ovarian ageing. *Mol Cell Endocrinol*, 163(1-2):43–48, May 2000.
30. J. E. Coxworth and K. Hawkes. Ovarian follicle loss in humans and mice: lessons from statistical model comparison. *Hum Reprod*, 25(7):1796–1805, Jul 2010.
31. J. Johnson, X. Chen, X. Xu, and J. Emerson. *ÖvSim: a Simulation of the Population Dynamics of Mammalian Ovarian Follicles*. BioRxiv, The Preprint Server for Biology, Vienna, Austria, 2016.
32. Howard C Berg. *Random walks in biology*. Princeton University Press, 1993.
33. E. A. Codling, M. J. Plank, and S. Benhamou. Random walk models in biology. *J R Soc Interface*, 5(25):813–834, Aug 2008.
34. J. R. Norris. *Markov Chains. Statistical & Probabilistic Mathematics*, page Cambridge University Press, 1998.
35. Crispin Gardiner. *Stochastic Methods: A Handbook for the Natural and Social Sciences*, volume 13 of *Springer Series in Synergetics*. Springer Berlin Heidelberg, 4th edition, 2009. ISBN 3642089623. doi: 10.1007/978-3-662-02377-8.
36. R Core Team. *R: A Language and Environment for Statistical Computing*. R Foundation for Statistical Computing, Vienna, Austria, 2021.
37. M. Depmann, M. J. Faddy, Y. T. van der Schouw, P. H. Peeters, S. L. Broer, T. W. Kelsey, S. M. Nelson, and F. J. Broekmans. The Relationship Between Variation in Size of the Primordial Follicle Pool and Age at Natural Menopause. *J Clin Endocrinol Metab*, 100(6): E845–851, Jun 2015.
38. M. J. Faddy and R. G. Gosden. A mathematical model of follicle dynamics in the human ovary. *Hum Reprod*, 10(4):770–775, Apr 1995.
39. M. Weinstein, T. Gorrindo, A. Riley, J. Mormino, J. Niefeldt, B. Singer, G. Rodríguez, J. Simon, and S. Pincus. Timing of menopause and patterns of menstrual bleeding. *Am J Epidemiol*, 158(8):782–791, Oct 2003.
40. S. M. McKinlay, N. L. Bifano, and J. B. McKinlay. Smoking and age at menopause in women. *Ann Intern Med*, 103(3):350–356, Sep 1985.
41. S. M. McKinlay, D. J. Brambilla, and J. G. Posner. The normal menopause transition. *Maturitas*, 14(2):103–115, Jan 1992.
42. R. T. Fleischer, B. J. Vollenhoven, and G. C. Weston. The effects of chemotherapy and radiotherapy on fertility in premenopausal women. *Obstet Gynecol Surv*, 66(4):248–254, Apr 2011.
43. M. Das, F. Shehata, W. Y. Son, T. Tulandi, and H. Holzer. Ovarian reserve and response to IVF and in vitro maturation treatment following chemotherapy. *Hum Reprod*, 27(8):2509–2514, Aug 2012.
44. C. E. Dunlop and R. A. Anderson. Uses of anti-Müllerian hormone (AMH) measurement before and after cancer treatment in women. *Maturitas*, 80(3):245–250, Mar 2015.
45. J. L. Chan, L. N. Johnson, B. L. Elymow, M. D. Sammel, and C. R. Gracia. Outcomes of ovarian stimulation after treatment with chemotherapy. *J Assist Reprod Genet*, 32(10): 1537–1545, Oct 2015.
46. M. J. Faddy, R. G. Gosden, A. Gougeon, S. J. Richardson, and J. F. Nelson. Accelerated disappearance of ovarian follicles in mid-life: implications for forecasting menopause. *Hum Reprod*, 7(10):1342–1346, Nov 1992.
47. A. L. Durlinger, P. Kramer, B. Karels, F. H. de Jong, J. T. Uilenbroek, J. A. Grootegoed, and A. P. Themmen. Control of primordial follicle recruitment by anti-Müllerian hormone in the mouse ovary. *Endocrinology*, 140(12):5789–5796, Dec 1999.
48. M. W. Pankhurst. A putative role for anti-Müllerian hormone (AMH) in optimising ovarian reserve expenditure. *J. Endocrinol.*, 233(1):R1–R13, Apr 2017.
49. L. E. Leidy, L. R. Godfrey, and M. R. Sutherland. Is follicular atresia biphasic? *Fertil Steril*, 70(5):851–859, Nov 1998.
50. T. W. Kelsey, P. Wright, S. M. Nelson, R. A. Anderson, and W. H. Wallace. A validated model of serum anti-Müllerian hormone from conception to menopause. *PLoS One*, 6(7):e22024, 2011.
51. R. Ratcliff and G. McKoon. The diffusion decision model: theory and data for two-choice decision tasks. *Neural Comput*, 20(4):873–922, Apr 2008.
52. R. Ratcliff, P. L. Smith, S. D. Brown, and G. McKoon. Diffusion Decision Model: Current Issues and History. *Trends Cogn Sci*, 20(4):260–281, Apr 2016.
53. L. Stolk, J. R. Perry, D. I. Chasman, C. He, M. Mangino, P. Sulem, M. Barbalic, L. Broer, E. M. Byrne, F. Ernst, T. Esko, N. Franceschini, D. F. Gudbjartsson, J. J. Hottenga, P. Kraft, P. F. McArdle, E. Porcu, S. Y. Shin, A. V. Smith, S. van Wingerden, G. Zhai, W. V. Zhuang, E. Albrecht, B. Z. Alizadeh, T. Aspelund, S. Bandinelli, L. B. Lauc, J. S. Beckmann, M. Boban, E. Boerwinkle, F. J. Broekmans, A. Burri, H. Campbell, S. J. Chanock, C. Chen, M. C. Cornelis, T. Corre, A. D. Coviello, P. d’Adamo, G. Davies, U. de Faire, E. J. de Geus, I. J. Deary, G. V. Dedoussis, P. Deloukas, S. Ebrahim, G. Eiriksdottir, V. Emilsson, J. G. Eriksson, B. C. Fauser, L. Ferrelli, L. Ferrucci, K. Fischer, A. R. Folsom, M. E. Garcia, P. Gasparini, C. Gieger, N. Glazer, D. E. Grobbee, P. Hall, T. Haller, S. E. Hankinson, M. Hass, C. Hayward, A. C. Heath, A. Hofman, E. Ingelsson, A. C. Janssens, A. D. Johnson, D. Karasik, S. L. Kardia, J. Keyzer, D. P. Kiel, I. Kolcic, Z. Kutalik, J. Lahti, S. Lai, T. Laisk, J. S. Laven, D. A. Lawlor, J. Liu, L. M. Lopez, Y. V. Louwers, P. K. Magnusson, M. Marongiu, N. G. Martin, I. M. Kilaric, C. Masciullo, B. McKnight, S. E. Medland, D. Meizer, V. Mooser, P. Navarro, A. B. Newman, D. R. Nyholt, N. C. Onland-Moret, A. Palotie, G. Par?, A. N. Parker, N. L. Pedersen, P. H. Peeters, G. Pistis, A. S. Plump, O. Polasek, V. J. Pop, B. M. Psaty, K. R?ikk?nen, E. Rehnberg, J. I. Rotter, I. Rudan, C. Sala, A. Salumets, A. Scuteri, A. Singleton, J. A. Smith, H. Snieder, N. Soranzo, S. N. Stacey, J. M. Starr, M. G. Stathopoulou, K. Stirrups, R. P. Stolk, U. Styrkarsdottir, Y. V. Sun, A. Tenesa, B. Thorand, D. Toniolo, L. Tryggvadottir, K. Tsui, S. Ulivi, R. M. van Dam, Y. T. van der Schouw, C. H. van Gils, P. van Nierop, J. M. Vink, P. M. Visscher, M. Voorhuis, G. Waeber, H. Wallaschofski, H. E. Wichmann, E. Widen, C. J. Wijndans-van Gent, G. Willemsen, J. F. Wilson, B. H. Wolfenbutter, A. F. Wright, L. M. Yerges-Armstrong, T. Zemunik, L. Zgaga, M. C. Zillikens, M. Zylmunt, M. M. Arnold, D. I. Boomsma, J. E. Buring, L. Crisponi, E. W. Demerath, V. Gudnason, T. B. Harris, F. B. Hu, D. J. Hunter, L. J. Launer, A. Metspalu, G. W. Montgomery, B. A. Oostra, P. M. Ridker, S. Sanna, D. Schlessinger, T. D. Spector, K. Stefansson, E. A. Steeten, U. Thorsteinsdottir, M. Uda, A. G. Uitterlinden, C. M. van Duijn, H. V?lzke, A. Murray, J. M. Murabito, J. A. Visser, and K. L. Lunetta. Meta-analyses identify 13 loci associated with age at menopause and highlight DNA repair and immune pathways. *Nat. Genet.*, 44(3):260–268, Jan 2012.
54. F. R. Day, K. S. Ruth, D. J. Thompson, K. L. Lunetta, N. Pervjakova, D. I. Chasman, L. Stolk, H. K. Finucane, P. Sulem, B. Bulik-Sullivan, T. Esko, A. D. Johnson, C. E. Elks, N. Franceschini, C. He, E. Altmaier, J. A. Brody, L. Franke, J. E. Huffman, M. F. Keller, P. F. McArdle, T. Nuttle, E. Porcu, A. Robino, L. M. Rose, U. M. Schick, J. A. Smith, A. Teumer, M. Traglia, D. Vuckovic, J. Yao, W. Zhao, E. Albrecht, N. Amin, T. Corre, J. J. Hottenga, M. Mangino, A. V. Smith, T. Tanaka, G. Abecasis, I. L. Andrlis, H. Anton-Culver, A. C. Antoniou, V. Arndt, A. M. Arnold, C. Barbieri, M. W. Beckmann, A. Beeghly-Fadiel, J. Benitez, L. Bernstein, S. J. Bielinski, C. Blomqvist, E. Boerwinkle, N. V. Bogdanova, S. E. Bojesen, M. K. Bolla, A. L. Borresen-Dale, T. S. Boutin, H. Brauch, H. Brenner, T. Br?ning, B. Burwinkel, A. Campbell, H. Campbell, S. J. Chanock, J. R. Chapman, Y. I. Chen, G. Chenevix-Trench, F. J. Couch, A. D. Coviello, A. Cox, K. Czene, H. Darabi, I. De Vivo, E. W. Demerath, J. Dennis, P. Devilee, T. D?rk, I. Dos-Santos-Silva, A. M. Dunning, J. D. Eicher, P. A. Fasching, J. D. Faul, J. Figueroa, D. Flesch-Janys, I. Gandini, M. E. Garcia, M. Garc?a-Closas, G. G. Giles, G. G. Giroto, M. S. Goldberg, A. Gonzalez-Neira, M. O. Goodarzi, M. L. Grove, D. F. Gudbjartsson, P. Gu?nel, X. Guo, C. A. Haiman, P. Hall, U. Hamann, B. E. Henderson, L. J. Hocking, A. Hofman, G. Homuth, M. J. Hooning, J. L. Hopper, F. B. Hu, J. Huang, K. Humphreys, D. J. Hunter, A. Jakubowska, S. E. Jones, M. Kabisch, D. Karasik, J. A. Knight, I. Kolcic, C. Kooperberg, V. M. Kosma, J. Kriebel, V. Kristensen, D. Lambrechts, C. Langenberg, J. Li, X. Li, S. Lindstr?m, Y. Liu, J. Luan, J. Lubinski, R. M?gi, A. Mannermaa, J. Manz, S. Margolin, J. Marten, N. G. Martin, C. Masciullo, A. Meindl, K. Michailidou, E. Mihailov, L. Milani, R. L. Milne, M. M?ller-Nurasyid, M. Nalls, B. M. Neale, H. Nevanlinna, P. Neven, A. B. Newman, B. G. Nordestgaard, J. E. Olson, S. Padmanabhan, P. Pterlongo, U. Peters, A. Petersmann, J. Peto, P. D. P. Pharoah, N. N. Pirastu, A. Pirie, G. Pistis, O. Polasek, D. Porteous, B. M. Psaty, K. Pyk?s, P. Radice, L. J. Raffel, F. Rivadeneira, I. Rudan, A. Rudolph, D. Ruggiero, C. F. Sala, S. Sanna, E. J. Sawyer, D. Schlessinger, M. K. Schmidt, F. Schmid, R. K. Schmutzler, M. J. Schoemaker, R. A. Scott, C. M. Seynaeve, J. Simard, R. Sorice, R. C. Southeby, D. St?ckl, K. Strauch, A. Swerdlow, K. D. Taylor, U. Thorsteinsdottir, A. E. Toland, I. Tomlinson, T. Truong, L. Tryggvadottir, S. T. Turner, D. Vozzi, Q. Wang, M. Wellons, G. Willemsen, J. F. Wilson, R. Winqvist, B. B. H. R. Wolfenbutter, A. F. Wright, D. Yannoukakis, T. Zemunik, W. Zheng, M. Zylmunt, S. Bergmann, D. I. Boomsma, J. E. Buring, L. Ferrucci, G. W. Montgomery, V. Gudnason, T. D. Spector, C. M. van Duijn, B. Z. Alizadeh, M. Ciullo, L. Crisponi, D. F. Easton, P. P. Gasparini, C. Gieger, T. B. Harris, C. Hayward, S. L. R. Kardia, P. Kraft, B. McKnight, A. Metspalu, A. C. Morrison, A. P. Reiner, P. M. Ridker, J. I. Rotter, D. Toniolo, A. G. Uitterlinden, S. Ulivi, H. V?lzke, N. J. Wareham, D. R. Weir, L. M. Yerges-Armstrong, A. L. Price, K. Stefansson, J. A. Visser, K. K. Ong, J. Chang-Claude, J. M. Murabito, J. R. B. Perry, and A. Murray. Large-scale genomic analyses link reproductive aging to hypothalamic signaling, breast cancer susceptibility and BRCA1-mediated DNA repair. *Nat Genet*, 47(11):1294–1303, Nov 2015.
55. P. Reddy, L. Liu, D. Adhikari, K. Jagarlamudi, S. Rajareddy, Y. Shen, C. Du, W. Tang, T. Hamalainen, S. L. Peng, Z. J. Lan, A. J. Cooney, I. Huhtaniemi, and K. Liu. Oocyte-specific deletion of Pten causes premature activation of the primordial follicle pool. *Science*, 319(5863):611–613, Feb 2008.
56. K. Jagarlamudi, L. Liu, D. Adhikari, P. Reddy, A. Idahl, U. Ottander, E. Lundin, and K. Liu. Oocyte-specific deletion of Pten in mice reveals a stage-specific function of PTEN/PI3K signaling in oocytes in controlling follicular activation. *PLoS ONE*, 4(7):e6186, Jul 2009.
57. Y. Cheng, J. Kim, X. X. Li, and A. J. Hsueh. Promotion of ovarian follicle growth following mTOR activation: synergistic effects of AKT stimulators. *PLoS ONE*, 10(2):e0117769, 2015.
58. L. L. Cui, G. Yang, J. Pan, and C. Zhang. Tumor necrosis factor alpha knockout increases fertility of mice. *Theriogenology*, 75(5):867–876, Mar 2011.
59. C. R. Greenfield, K. F. Roby, M. E. Pepling, J. K. Babus, P. F. Terranova, and J. A. Flaws. Tumor necrosis factor (TNF) receptor type 2 is an important mediator of TNF alpha function in the mouse ovary. *Biol. Reprod.*, 76(2):224–231, Feb 2007.
60. C.J. Wright, E. Llerena Cari, J. Sandoval, C.E. Bales, P.K. Sam, A. Kallen, A. Polotsky, and J. Johnson. Control of primordial follicle growth activation by  $\text{I}\kappa\text{B}/\text{NF}\kappa\text{B}$  signaling. *Reprod. Sci.*, 27(11):2063–2074, 2020.
61. H. Yan, J. Wen, T. Zhang, W. Zheng, M. He, K. Huang, Q. Guo, Q. Chen, Y. Yang, G. Deng, J. Xu, Z. Wei, H. Zhang, G. Xia, and C. Wang. Oocyte-derived E-cadherin acts as a multiple functional factor maintaining the primordial follicle pool in mice. *Cell Death Dis*, 10(3):160, 02 2019.
62. L. Zheng, R. Luo, T. Su, L. Hu, F. Gao, and X. Zhang. Differentially Expressed lncRNAs After the Activation of Primordial Follicles in Mouse. *Reprod Sci*, 26(8):1094–1104, 08 2019.
63. S. W. Maaouf, W. S. Liu, and J. L. Pate. MicroRNA in ovarian function. *Cell Tissue Res*,



- 363(1):7–18, Jan 2016.
64. L. Q. Wang, J. C. Liu, C. L. Chen, S. F. Cheng, X. F. Sun, Y. Zhao, S. Yin, Z. M. Hou, B. Pan, C. Ding, W. Shen, and X. F. Zhang. Regulation of primordial follicle recruitment by cross-talk between the Notch and phosphatase and tensin homologue (PTEN)/AKT pathways. *Reprod Fertil Dev*, 28(6):700–712, Apr 2016.
  65. S. Yang, S. Wang, A. Luo, T. Ding, Z. Lai, W. Shen, X. Ma, C. Cao, L. Shi, J. Jiang, F. Rong, L. Ma, Y. Tian, X. Du, Y. Lu, Y. Li, and S. Wang. Expression patterns and regulatory functions of microRNAs during the initiation of primordial follicle development in the neonatal mouse ovary. *Biol Reprod*, 89(5):126, Nov 2013.
  66. C. Qin, X. Xia, Y. Fan, Y. Jiang, Y. Chen, N. Zhang, B. Uslu, J. Johnson, and A. N. Kallen. A novel, noncoding-RNA-mediated, post-transcriptional mechanism of anti-Müllerian hormone regulation by the H19/let-7 axis. *Biol Reprod*, 100(1):101–111, 01 2019.
  67. H. Zhang and K. Liu. Cellular and molecular regulation of the activation of mammalian primordial follicles: somatic cells initiate follicle activation in adulthood. *Hum. Reprod. Update*, 21(6):779–786, 2015.
  68. P. Reddy, W. Zheng, and K. Liu. Mechanisms maintaining the dormancy and survival of mammalian primordial follicles. *Trends Endocrinol. Metab.*, 21(2):96–103, Feb 2010.
  69. E. H. Ernst, M. L. Grøndahl, S. Grund, K. Hardy, A. Heuck, L. Sunde, S. Franks, C. Y. Andersen, P. Villesen, and K. Lykke-Hartmann. Dormancy and activation of human oocytes from primordial and primary follicles: molecular clues to oocyte regulation. *Hum Reprod*, 32(8):1684–1700, 08 2017.
  70. L. M. Nelson. Clinical practice. Primary ovarian insufficiency. *N. Engl. J. Med.*, 360(6):606–614, Feb 2009.
  71. J. L. Simpson. Genetic and phenotypic heterogeneity in ovarian failure: overview of selected candidate genes. *Ann N Y Acad Sci*, 1135:146–154, 2008.
  72. L. Persani, R. Rossetti, and C. Cacciato. Genes involved in human premature ovarian failure. *J Mol Endocrinol*, 45(5):257–279, Nov 2010.
  73. Ankit Rohatgi. *Webplotdigitizer*: Version 4.5, 2021.
  74. Patrick Billingsley. *Probability and measure*. John Wiley & Sons, 1995.

Figures.

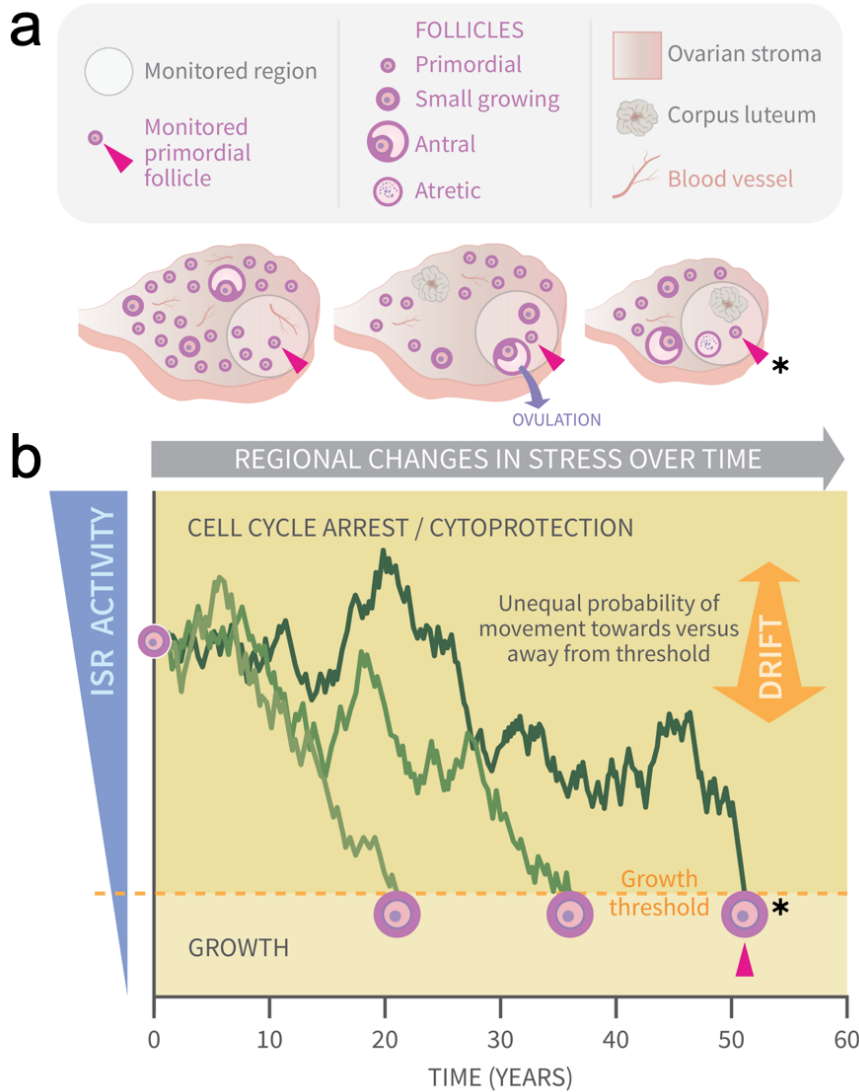

**Figure i. Graphical Abstract: Modeling primordial ovarian follicle growth activation with random walks.** The control mechanism that determines when individual primordial follicles (PFs) begin to grow over time is unknown. The ovary is a uniquely dynamic organ that undergoes constant remodeling (ovaries, panel a) as follicles grow and die, and sometimes ovulate and form *corpora lutea*. The organ also changes with age, and this includes diminishing numbers of follicles, alterations in the ovarian stroma, and changes in blood vessels and their distribution. These dynamic changes include regional signaling differences in the ovary (intra-ovarian "microenvironments"), including factors that induce stress and damage over time (grey arrow). In panel a, the same dormant PF (red arrowhead) and its immediately surrounding ovarian region are monitored over time. As structures develop, change, and die in that region, the monitored PF is subject to dynamically changing signals and physiological damage-inducing agents that activate the ISR. Spatiotemporally fluctuating ISR activity is simplified in panel b (modified from 20). When ISR activity is high, CELL CYCLE ARREST and CYTOPROTECTION occur due to checkpoint activation. If ISR activity declines enough in a PF to the point of ISR checkpoint resolution, a Growth Threshold is crossed, and pregranulosa cell cycle entry and GROWTH occurs (asterisk, monitored PF). In the plot in panel b, three PFs experience fluctuating ISR activity due to fluctuating stress and damage (y-axis) over time (x-axis), and this is modeled as random walks (RWs). Each PF begins the RW at time 0 ("birth", PF on y-axis), and dark plot lines indicate changing ISR activity as a RW over time (x-axis). Two PFs cross the PFGA threshold at approximately ages 21 and 38, and the monitored PF in panel a crosses the threshold at age 52 (red triangle, asterisk). Impacts of the following potential sources of variability between simulated women upon RW patterns and the timing of PF exhaustion are considered. First, variation in PF numbers between subjects around the time of birth is modeled according to the reported distribution (Starting Supply, 3). Second, the probability of PF movement is modified so that "Drift" towards the growth threshold occurs (b, orange block arrow at right); the amount of Drift is optionally modeled to vary between simulated subjects.

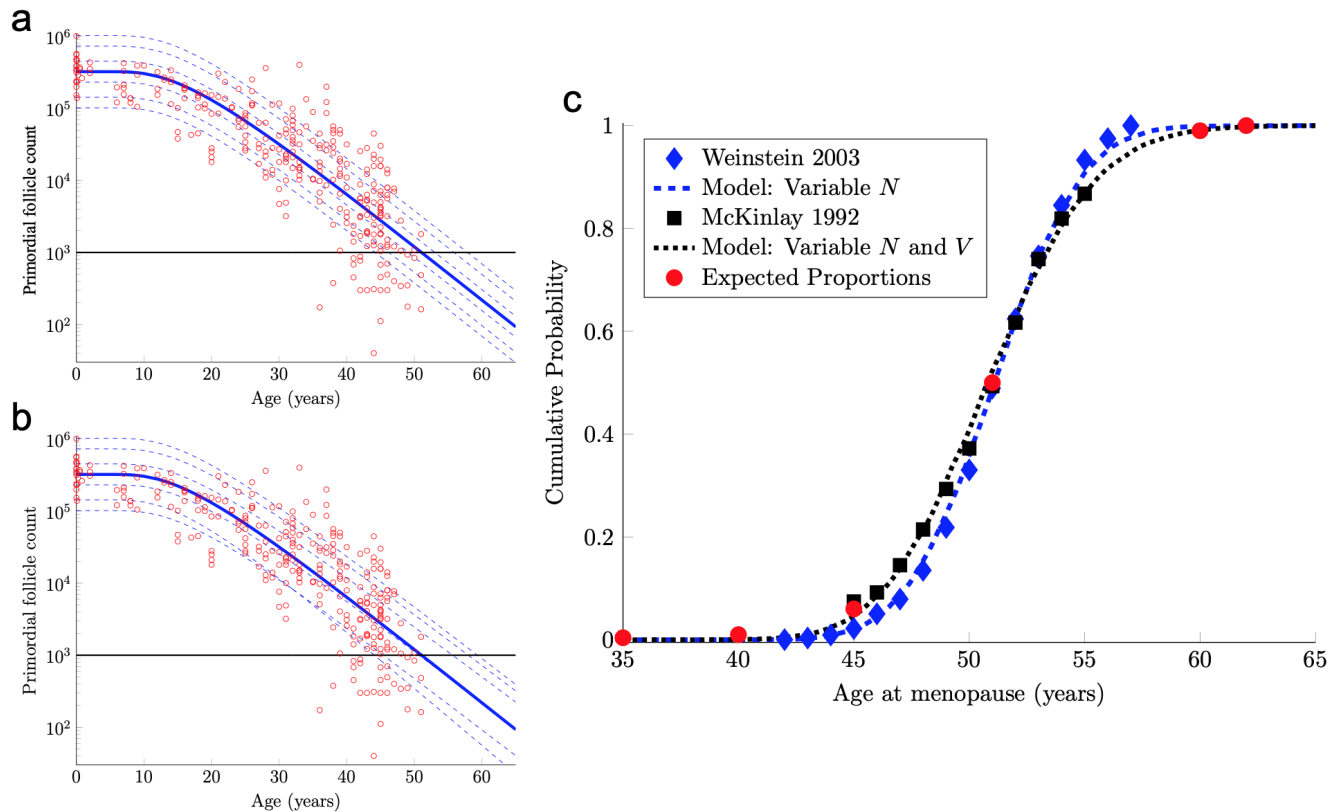

**Fig. 1. Continuous one-dimensional random walk modeling of ovarian aging over simulated time.** Panel a shows the number of PFs in ovarian histological preparations over more than 6 decades (red circles, data from 3). The overlaid blue solid line is our output from a RW model when the starting number of PFs is set to the population median. These RW settings result in the decay curve crossing an "ANM" threshold of 1000 remaining PFs at 51 years (black horizontal lines in a and b). Additional decay curves were determined by applying different starting points from the PF Starting Supply distribution at time 0 from the same dataset (1a, dashed blue lines, see also Supplemental Figure S1). Fig 1a depicts the outcome when homogenous Drift is applied to simulated subjects (Subject-Identical Drift). RW model output when Drift was heterogeneous between subjects is shown in panel b. In a and b, dashed blue lines are RW output when Starting Supply was set arbitrarily to the values shown. Note that unlike homogenous Drift between subjects where parallel decay lines result (1a), heterogeneous Drift results in decay that differs in trajectory between subjects, as seen in crossing blue dashed lines in 1b. In panel 1c, ANM distributions reported by 39 (blue diamonds) and 40, 41 (black squares) are overlaid with simulation output in the CDF plot. Red dots in 1c reflect the proportions of the population that are expected to reach menopause by the corresponding ages (e.g., approximately 1% of women reaching menopause before age 40, a median ANM of 51, and very few to no women reaching menopause after age 62). The blue dashed line in 1c is our RW output when only PF Starting Supply varies (e.g., homogenous Drift), and the black dotted line in 1c is our RW output when Drift is heterogeneous. Simulation output from these conditions are provided as histograms in Supplemental Fig. S2 as compiled results from 10000 simulations of the time that the 1000-PF threshold was crossed by each subject.

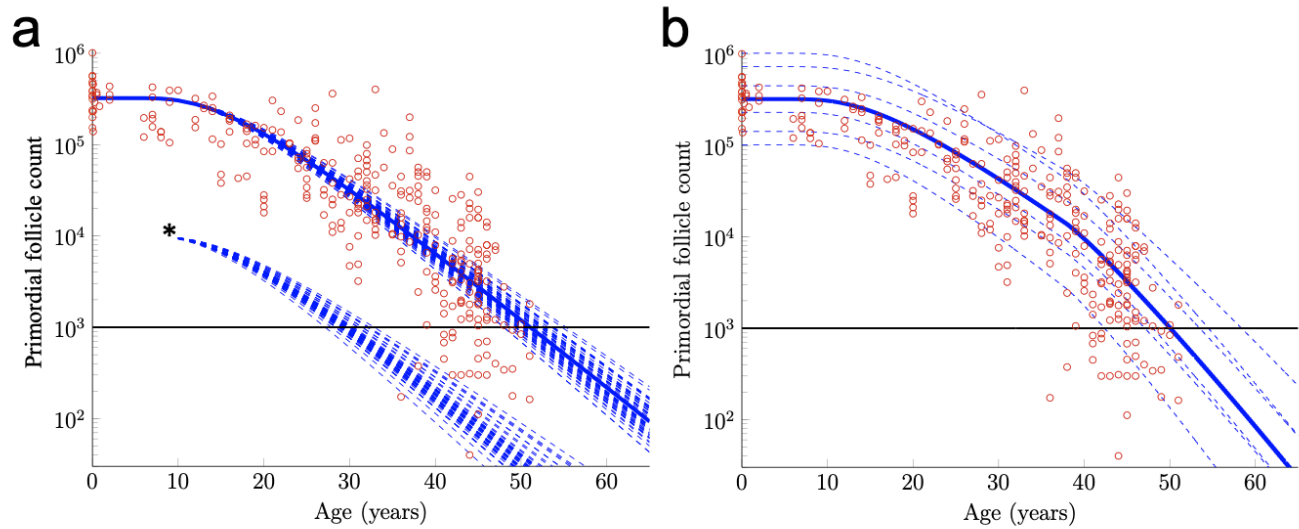

**Fig. 2. Further exploration of primordial follicle loss with aging: ANM variability, impact of simulated acute loss, and simulation of accelerating growth activation with time.** In panel a, identical conditions were used as in as in 1b with subject-variable Drift, but here, results from 50 RWs that all begin at the median Starting Supply value are traced. ANM variability given the same Starting Supply but varying Drift is shown in the varied points that dashed decay curves cross the ANM threshold (black horizontal line; see also histogram in Fig. S2). Also in a, 50 resulting trajectories from a simulated subject that experienced an acute loss of PFs at approximately 12 years are shown (indicated by \*). Next, in distinct simulation conditions, the Drift applied was constant until age 38 years, when a one-time elevation in Drift is applied for the remainder of the simulation. The resulting ANM distribution from 10000 subjects under the conditions used in b is provided as a histogram in Supplemental Figure S2.

## APPENDIX

Supplemental information in support of our mathematical modeling approach is provided as follows. We first expand upon the alignment between continuous and discrete random walk models, then provide the justification for treatment of PF Starting Supply as a log-normal distribution (Fig. S1), and finally provide ANM simulation results as histograms for further consideration.

### Discrete and continuous random walk models

We now show the equivalence of the discrete random walk in Eq. (1) and the continuous random walk in Eq. (2) for small steps  $\Delta t$  and  $\Delta x$ . The discrete random walk in Eq. (1) can be written as

$$X((n+1)\Delta t) = X(n\Delta t) + \Delta x \xi_{n+1}, \quad n \geq 0, \quad (12)$$

where  $\{\xi_n\}_{n \geq 1}$  is an independent and identically distributed (iid) sequence of random variables with

$$\xi_n = \begin{cases} +1 & \text{with probability } p, \\ -1 & \text{with probability } 1-p. \end{cases}$$

Defining  $D$  and  $V$  as in Eq. (3), the discrete random walk Eq. (12) can be written as

$$X((n+1)\Delta t) = X(n\Delta t) - V\Delta t + \sqrt{2D\Delta t} Z_{n+1}, \quad n \geq 0, \quad (13)$$

where

$$Z_n := \xi_n - 2p + 1, \quad n \geq 1.$$

Notice that  $\{Z_n\}_{n \geq 1}$  is an iid sequence with

$$\mathbb{E}[Z_n] = 0, \quad \text{Variance}(Z_n) = 4p(1-p).$$

If we take  $\Delta x \rightarrow 0$ ,  $\Delta t \rightarrow 0$ , and  $p \rightarrow 1/2$  while keeping  $D$  and  $V$  in Eq. (3) fixed, applying the functional central limit theorem (74) to Eq. (13) yields that the discrete random walk  $\{X(n\Delta t)\}_{n \geq 0}$  converges in distribution to the continuous random walk  $\{X(t)\}_{t \geq 0}$  process satisfying the stochastic differential equation in Eq. (2).

### Reserve exit time $\tau$ .

**Exact probability distribution of  $\tau$ .** For the continuous random walk  $\{X(t)\}_{t \geq 0}$  satisfying Eq. (2), the reserve exit time  $\tau$  is the first time that the random walk leaves the interval  $(0, L)$ . Mathematically, this is denoted by

$$\tau := \inf\{t > 0 : X(t) \notin (0, L)\}. \quad (14)$$

Define the survival probability,

$$S(x, t) := \mathbb{P}(\tau > t | X(0) = x),$$

where we have conditioned on the initial position of the random walk. The survival probability  $S(x, t)$  is the unique solution of the following backward Kolmogorov equation (35),

$$\frac{\partial}{\partial t} S = D \frac{\partial^2}{\partial x^2} S - V \frac{\partial}{\partial x} S, \quad x \in (0, L), t > 0, \quad (15)$$

with absorbing Dirichlet boundary conditions,  $S(0, t) = S(L, t) = 0$ , and unit initial condition  $S(x, 0) = 1$ .

In order to solve for  $S(x, t)$ , we first define the solution operator for the partial differential equation in Eq. (23) subject to absorbing boundary conditions in the special case that  $V = 0$  by  $\Phi^t(q)$ . That is,  $\Phi^t$  is a linear operator that takes an initial condition,  $q(x)$ , and maps it to the solution of Eq. (23) with  $V = 0$  subject to absorbing boundary conditions at time  $t > 0$ . It is straightforward to solve for  $\Phi^t$  explicitly via a standard separation of variables calculation and find

$$(\Phi^t(q))(x) = \sum_{k=1}^{\infty} \langle \phi_k, q \rangle e^{-\nu_k t} \phi_k(x), \quad (16)$$

where the eigenvalues,  $\{\nu_k\}_{k \geq 1}$ , and orthonormal eigenfunctions,  $\{\phi_k\}_{k \geq 1}$ , are given by

$$\nu_k = \frac{Dk^2\pi^2}{L^2}, \quad \phi_k(x) = \sqrt{\frac{2}{L}} \sin\left(\frac{k\pi x}{L}\right), \quad (17)$$

and  $\langle \cdot, \cdot \rangle$  denotes the inner product,

$$\langle f, g \rangle := \int_0^L f(x)g(x) dx.$$

It follows that

$$S(x, t) = e^{\frac{V}{2D}x} e^{-\frac{V^2}{4D}t} \Phi^t(e^{\frac{-V}{2D}x}). \quad (18)$$

To make Eq. (18) explicit, we first calculate the inner product

$$\begin{aligned} \langle \phi_k(x), e^{\frac{-V}{2D}x} \rangle &= \int_0^L e^{\frac{-V}{2D}x} \sqrt{\frac{2}{L}} \sin\left(\frac{k\pi x}{L}\right) dx \\ &= \frac{4\sqrt{2}\pi D^2 k \sqrt{L} \left(1 - (-1)^k e^{\frac{-LV}{2D}}\right)}{4\pi^2 D^2 k^2 + L^2 V^2}, \quad k \geq 1. \end{aligned}$$

Therefore, Eq. (16) and Eq. (18) imply

$$S(x, t) = \sum_{k=1}^{\infty} A_k e^{-\lambda_k t}, \quad (19)$$

where

$$\begin{aligned} \lambda_k &:= \frac{Dk^2\pi^2}{L^2} + \frac{V^2}{4D} \\ A_k &:= \frac{4\sqrt{2}\pi D^2 k \sqrt{L} \left(1 - (-1)^k e^{\frac{-LV}{2D}}\right)}{4\pi^2 D^2 k^2 + L^2 V^2} e^{\frac{V}{2D}x} \sqrt{\frac{2}{L}} \sin\left(\frac{k\pi x}{L}\right), \quad k \geq 1. \end{aligned}$$

**Growth and death probabilities.** In our model, a PF begins to grow if its ISR activity hits the growth threshold at  $X = 0$  and it dies before beginning to grow if its ISR activity hits the death threshold at  $X = L > 0$ . For the parameter values in Eq. (6), the vast majority of PFs grow rather than die.

To study this quantitatively, define

$$\begin{aligned} \tau_0 &:= \{t > 0 : X(t) = 0\}, \\ \tau_L &:= \{t > 0 : X(t) = L\}. \end{aligned}$$

In words,  $\tau_0$  is the first time the random walk reaches 0, and  $\tau_L$  is the first time the random walk reaches  $L$ . Note that the reserve exit time  $\tau$  in Eq. (14) is thus the minimum of  $\tau_0$  and  $\tau_L$ . Hence, a PF dies before beginning to grow if  $\tau_0 > \tau_L$  (i.e. if its ISR activity hits the death threshold at  $X = L$  before the growth threshold at  $X = 0$ ).

Define the probability that a PF dies before beginning to grow,

$$u(x) := \mathbb{P}(\tau_0 > \tau_L \mid X(0) = x), \quad (20)$$

where we have conditioned on the initial ISR activity,  $X(0) = x$ . The probability  $u(x)$  satisfies Gardiner (35)

$$0 = D \frac{d^2}{dx^2} u - V \frac{d}{dx} u, \quad x \in (0, L),$$

with boundary conditions  $u(0) = 0$  and  $u(L) = 1$ . It is straightforward to check that the unique solution to this boundary value problem is

$$u(x) = \frac{e^{-\frac{V(L-x)}{D}} - e^{-\frac{VL}{D}}}{1 - e^{-\frac{VL}{D}}}. \quad (21)$$

Evaluating Eq. (21) at the parameter values in Eq. (6) yields

$$u(x) = 2.05 \times 10^{-6}. \quad (22)$$

**Approximate probability distribution of  $\tau$ .** We have found that the vast majority of PFs hit the growth threshold before the death threshold. This suggests that we can approximate the probability distribution of  $\tau$  by ignoring the death threshold. To study this case, define the survival probability,

$$S_0(x, t) := \mathbb{P}(\tau_0 > t | X(0) = x).$$

The survival probability  $S_0(x, t)$  is the unique solution of the following backward Kolmogorov equation, (35)

$$\begin{aligned} \frac{\partial}{\partial t} S_0 &= D \frac{\partial^2}{\partial x^2} S_0 - V \frac{\partial}{\partial x} S_0, \quad x > 0, t > 0, \\ S_0 &= 0, \quad x = 0, \\ S_0 &= 1, \quad t = 0. \end{aligned} \tag{23}$$

A straightforward calculus exercise verifies that

$$S_0(x, t) = \frac{1}{2} \left[ 1 + \operatorname{erf} \left( \frac{x - Vt}{\sqrt{4Dt}} \right) - e^{Vx/D} \left( 1 - \operatorname{erf} \left( \frac{x + Vt}{\sqrt{4Dt}} \right) \right) \right]$$

satisfies Eq. (23). Equation Eq. (7) then follows from Eq. (4) upon setting  $x = 1$ .

For the values of  $V$  and  $D$  in Eq. (6) with  $x = 1$  and  $L \geq 2$ , the solution  $S(x, t)$  is well-approximated by  $S_0(x, t)$ . Again, the basic reason is that for these parameter values, it is very unlikely for a PF to hit the death threshold at  $L$  before the growth threshold at 0. To make this precise, observe that

$$\begin{aligned} \mathbb{P}(\tau_0 > t) &= \mathbb{P}(\tau_0 > t, \tau_L > \tau_0) + \mathbb{P}(\tau_0 > t, \tau_0 > \tau_L) \\ &\leq \mathbb{P}(\tau_0 > t, \tau_L > t) + \mathbb{P}(\tau_0 > \tau_L) \\ &= \mathbb{P}(\tau > t) + \mathbb{P}(\tau_0 > \tau_L). \end{aligned}$$

Therefore,

$$0 \leq \mathbb{P}(\tau_0 > t) - \mathbb{P}(\tau > t) \leq \mathbb{P}(\tau_0 > \tau_L). \tag{24}$$

By definition of  $S$  and  $S_0$ , the bound Eq. (24) implies

$$0 \leq S_0(x, t) - S(x, t) \leq u(x), \tag{25}$$

where  $u(x)$  is the probability in Eq. (20). Evaluating  $u(x)$  at the parameter values in Eq. (6) as in Eq. (22), we obtain

$$0 \leq S_0(x, t) - S(x, t) \leq 2.05 \times 10^{-6}.$$

**Starting Supply distribution.** We model the distribution of the Starting Supply  $N$  across a population of women as a log-normal distribution as in Eq. (8)-Eq. (9). The parameters  $\mu$  and  $\sigma$  in Eq. (8) are the respective mean and standard deviation of the natural logarithm of the 30 PF counts in Wallace and Kelsey (3) taken from women who were at least 6 months gestation and at most one month post birth. In Figure S1a, we plot the histogram of these 30 PF counts (blue bars), which is well-approximated by the probability density function of the log-normal distribution in Eq. (9) with  $\mu$  and  $\sigma$  in Eq. (8) (dashed black curve). In Figure S1b, we plot the corresponding empirical cumulative distribution function for these 30 PF counts (solid blue curve) and the cumulative distribution function of the log-normal distribution in Eq. (8)-Eq. (9) (dashed black curve). The Kolmogorov-Smirnov distance between these two distributions in Figure S1b (i.e. the maximum absolute difference) is only 0.1, which has a corresponding p-value of 0.88 for the null hypothesis that these 30 PF counts are indeed sampled from the log-normal distribution in Eq. (8)-Eq. (9).

We chose to consider women who were within a few months of birth since only 15 PF counts in Wallace and Kelsey (3) were from women at birth. However, considering only these 15 PF counts at birth would have little effect on our results, and would only change the values  $\mu = 12.686$ ,  $\sigma = 0.497$  in Eq. (8) to  $\mu = 12.801$ ,  $\sigma = 0.490$ .

## Supplemental Figures

Supplemental information in support of our mathematical modeling approach is provided as follows. First, we show how PF Starting Supply was determined according to the distribution of PF numbers around the time of birth produced by Wallace and Kelsey (3) (Fig. S1).

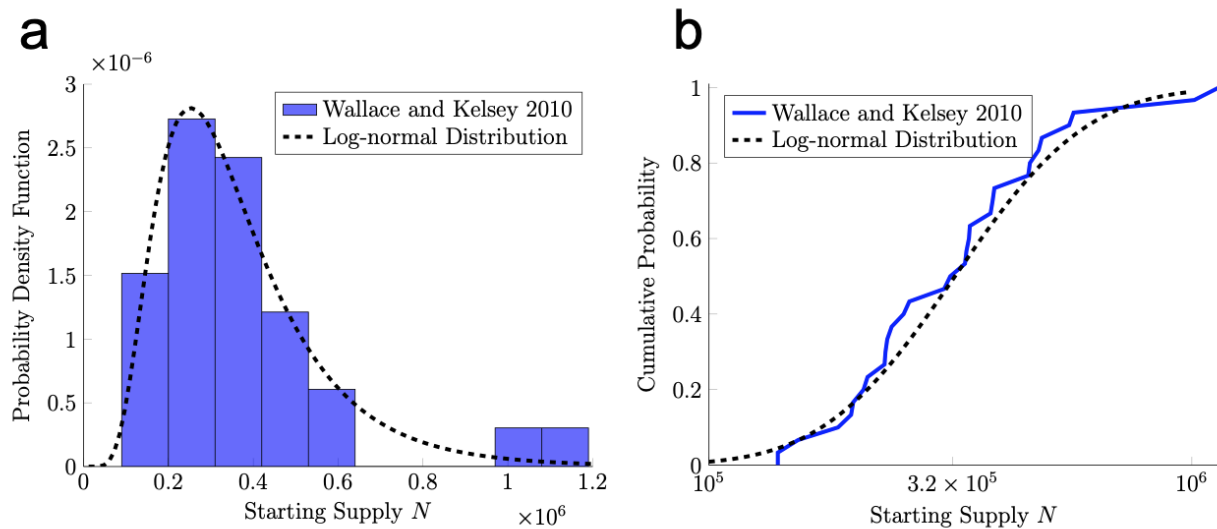

**Appendix 1, Figure S1.** Starting Supply distribution. In panel a, we plot a histogram of the 30 PF counts for women near birth reported by Wallace and Kelsey (3) (blue bars), which is well-approximated by the log-normal distribution in Eq. (8)-Eq. (9) (dashed black curve). In panel b, we provide a cumulative distribution function plot of observed PF counts (blue solid line) versus the log-normal distribution (dashed black curve).



ANM histograms in Fig. S2 correspond to data shown in Figures 1 and 2, with model conditions indicated by Figure panel.

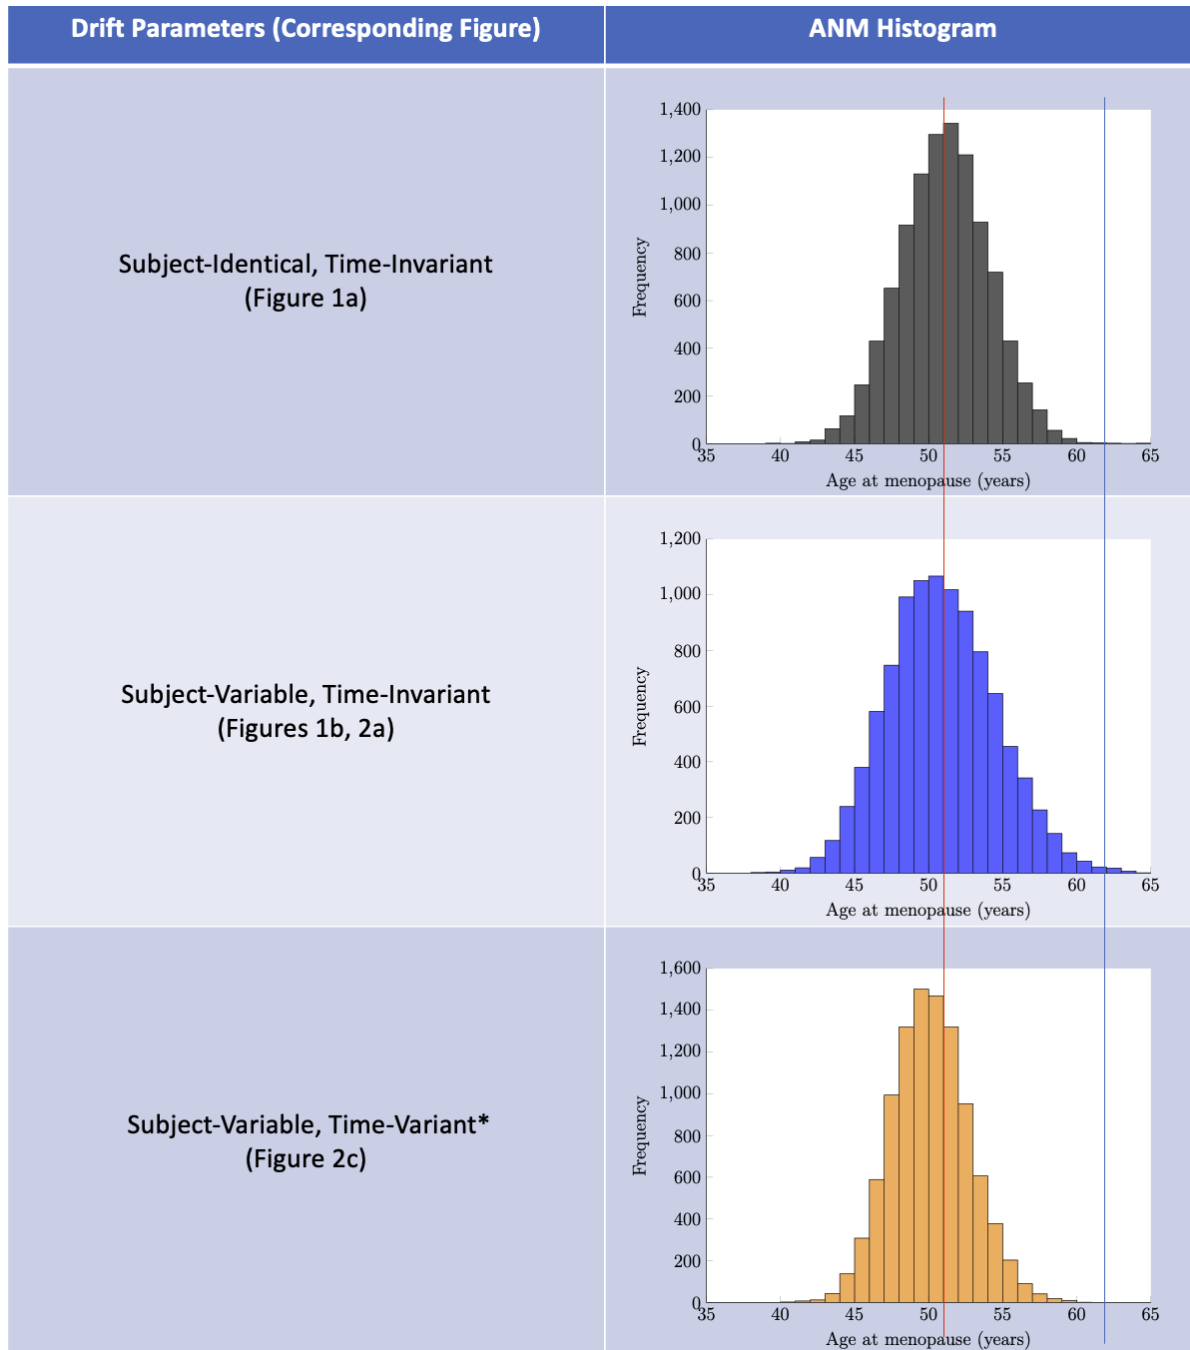

**Appendix 1, Figure S2.** ANM histograms generated from RW output when Drift was set as specified in "Drift Parameters" column. As shown, an ANM distribution centered around a median age of approximately 51 (red vertical line) can be produced in each case, with few simulated subjects reaching menopause before 40 years and after 60 years. Time-Variant Drift indicated by the asterisk (\*) was applied by modifying Drift conditions and also applying a single step Drift acceleration in year 38 of simulation time. This was used to interrogate the possibility that PF loss accelerates during reproductive aging. Note that here, the ANM distribution generated when Subject-Variable Drift is applied (middle panel) is broader than that seen for homogenous Drift (top panel) given otherwise identical model conditions. Application of Time-Variant Drift resulted again in a narrower ANM distribution, and prevented simulated subjects from reaching the ANM threshold after age 62 (blue vertical line).
